# Supplementary material
Source: PubMed Central journal article supplement (PMC7043072)
Supplement: flgastro-2019-101237supp003.pdf [file flgastro-2019-101237supp003.pdf]

Strata + Immunomodulator=No + Immunomodulator=Yes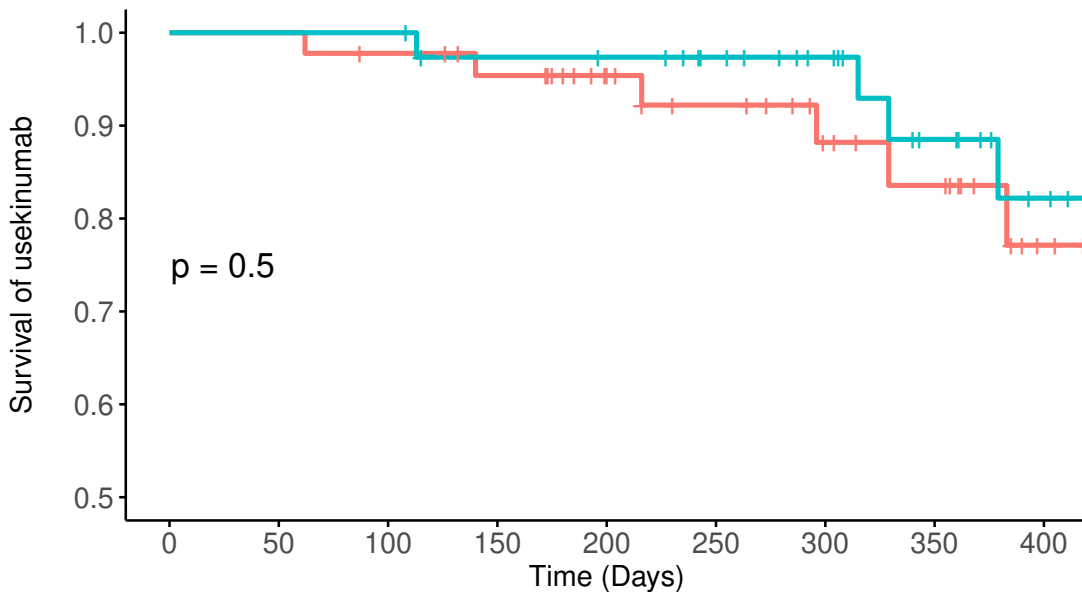

Number of patients on ustekinumab

|   |    |    |    |    |    |    |    |    |    |
|---|----|----|----|----|----|----|----|----|----|
| — | 45 | 45 | 43 | 40 | 32 | 27 | 21 | 18 | 9  |
| — | 39 | 39 | 39 | 36 | 35 | 31 | 25 | 18 | 12 |

Cumulative number of patients stopping ustekinumab

|   |   |   |   |   |   |   |   |   |   |
|---|---|---|---|---|---|---|---|---|---|
| — | 0 | 0 | 1 | 2 | 2 | 3 | 4 | 5 | 6 |
| — | 0 | 0 | 0 | 1 | 1 | 1 | 1 | 3 | 4 |
