# Supplementary material
Source: PubMed Central journal article supplement (PMC7043072)
Supplement: flgastro-2019-101237supp005.pdf [file flgastro-2019-101237supp005.pdf]

## Early Real-World Effectiveness of Ustekinumab for Crohn's Disease

### SUPPLEMENTAL DATA

Figure 5: Subject flow diagram

Figure 6: PGA at each review

Figure 7: Survival curves for patients on monotherapy versus those on concomitant immunomodulator

Figure 8: Changes in CRP (A, B), albumin (C, D) and calprotectin (E, F) for patients with normal baseline results.
