# Supplementary material
Source: PubMed Central journal article supplement (PMC7043072)

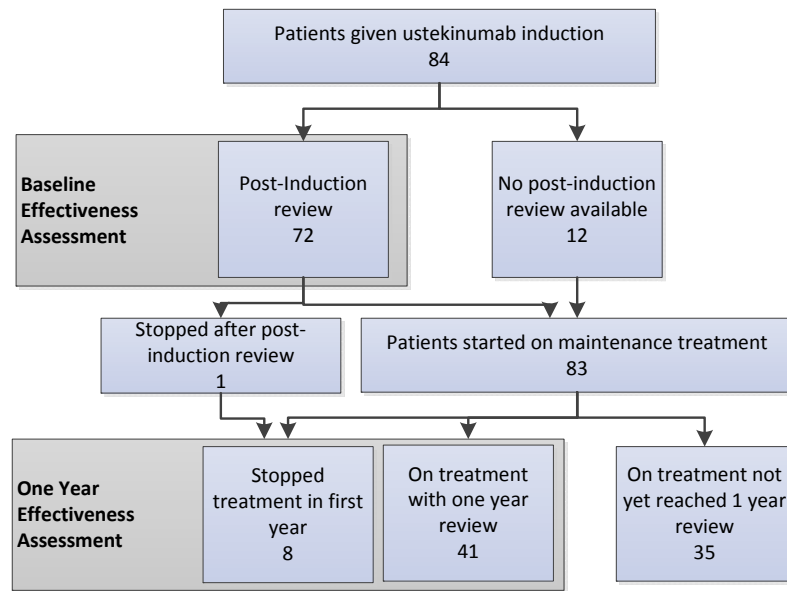

Supplement: flgastro-2019-101237supp001.pdf [file flgastro-2019-101237supp001.pdf]

# Percent of patients

Supplementary material

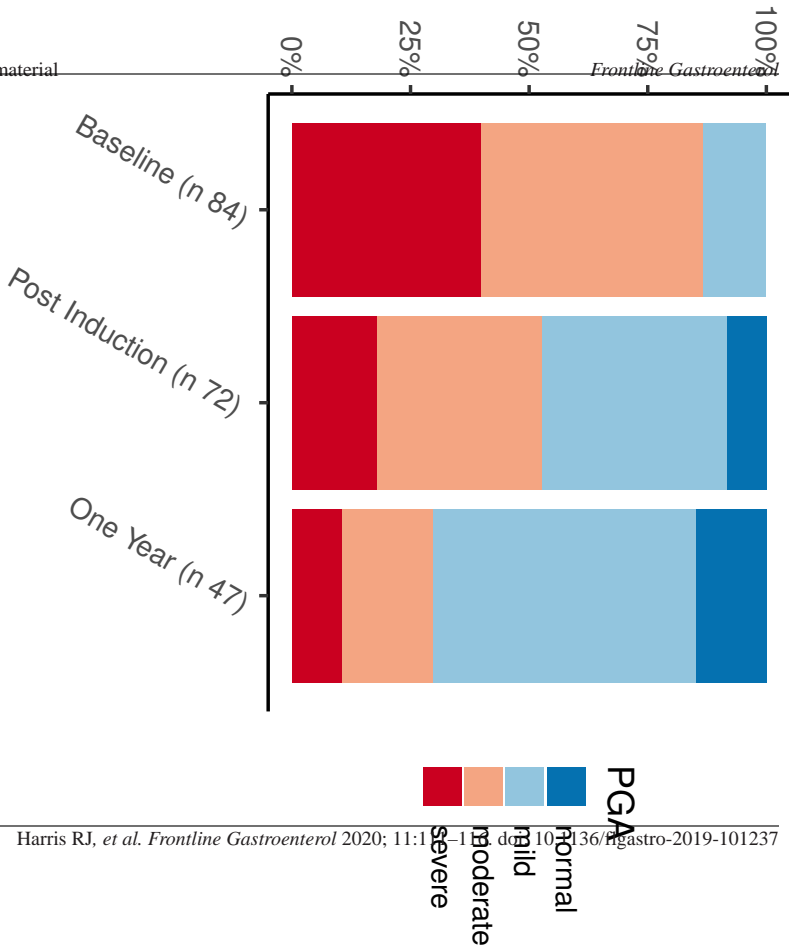

Supplement: flgastro-2019-101237supp002.pdf [file flgastro-2019-101237supp002.pdf]
